# Supplementary material
Source: Springer Nature journal article supplement (https://www.springermedizin.de/resource/supplementary/12906_2006_118_MOESM6_ESM.pdf/9524108)

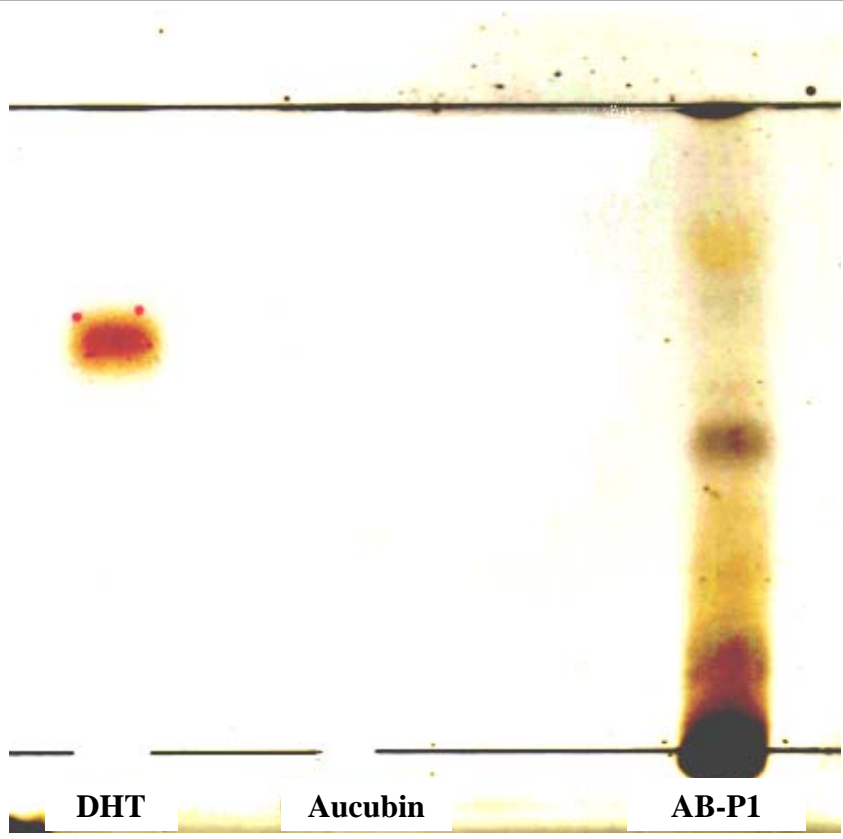

DHT

Aucubin

AB-P1

5

4-5

4

3-4

3

2-3

2

1-2

1

Supplement: MOESM6 [file 9524108]
